# Supplementary material for: NOX activation in reactive astrocytes regulates astrocytic LCN2 expression and neurodegeneration
Source: PubMed Central journal article supplement (PMC9018876; doi:10.1038/s41419-022-04831-8), 2022-04-19
Supplement: 41419_2022_4831_MOESM4_ESM.pdf [file 41419_2022_4831_MOESM4_ESM.pdf]

**Re: Author agreement\_CDDIS-21-4158RR**

Ruijia Liu &lt;ruijia.rachel@gmail.com&gt;

Fri 4/1/2022 10:07 AM

To: Begum, Gulnaz &lt;gub6@pitt.edu&gt;

Hi Gulnaz,

I agree to the authorship inclusions/changes.

Thanks,  
RuijiaOn Fri, Apr 1, 2022 at 9:50 PM Begum, Gulnaz <[gub6@pitt.edu](mailto:gub6@pitt.edu)> wrote:

Dear Ruijia,

Our manuscript entitled "NOX activation in reactive astrocytes regulates astrocytic LCN2 expression and neurodegeneration" has been accepted for publication in Cell death and disease journal. There are following changes in the authorship: "Yang Chen"; "Okan Capuk"; "Ming Sun", and "Jenelle M Collier" have been included because they collected new experimental results in the re submission. Dandan Sun has been removed from the authorship based on her request. Please reply to this email stating you agree to the authorship inclusions/changes. Following is the order of the authors/co-authors as appear in the manuscript.

"NOX activation in reactive astrocytes regulates astrocytic LCN2 expression and neurodegeneration"

Ruijia Liu<sup>1, 2</sup>, Jun Wang<sup>2</sup>, Yang Chen<sup>2</sup>, Jenelle M. Collier<sup>2, 3</sup>, Okan Capuk<sup>2</sup>, Shijie Jin<sup>4</sup>, Ming Sun<sup>5</sup>, Sujan K. Mondal<sup>6</sup>, Theresa L. Whiteside<sup>6</sup>, Donna B. Stolz<sup>5</sup>, Yongjie Yang<sup>4</sup>, Gulnaz Begum<sup>2\*</sup>

Please reply to this email "**ASAP**"

Thank you,  
Gulnaz Begum

**Re: Author agreement\_CDDIS-21-4158RR**

Jun Wang &lt;wangjdeh@163.com&gt;

Fri 4/1/2022 8:32 PM

To: Begum, Gulnaz &lt;gub6@pitt.edu&gt;

Yes, I agree.

Thanks,

Jun

 **Jun Wang**

邮箱: wangjdeh@163.com

签名由 网易邮箱大师 定制

On 04/02/2022 08:10, [Begum, Gulnaz](#) wrote:

Dear Jun,

Our manuscript entitled "NOX activation in reactive astrocytes regulates astrocytic LCN2 expression and neurodegeneration" has been accepted for publication in Cell death and disease journal. There are following changes in the authorship: "Yang Chen"; "Okan Capuk"; "Ming Sun", and "Jenelle M Collier" have been included because they collected new experimental results in the re submission. Dandan Sun has been removed from the authorship based on her request. Please reply to this email stating you agree to the authorship inclusions/changes. Following is the order of the authors/co-authors as appear in the manuscript.

"NOX activation in reactive astrocytes regulates astrocytic LCN2 expression and neurodegeneration"

Ruijia Liu<sup>1, 2</sup>, Jun Wang<sup>2</sup>, Yang Chen<sup>2</sup>, Jenelle M. Collier<sup>2, 3</sup>, Okan Capuk<sup>2</sup>, Shijie Jin<sup>4</sup>, Ming Sun<sup>5</sup>, Sujan K. Mondal<sup>6</sup>, Theresa L. Whiteside<sup>6</sup>, Donna B. Stolz<sup>5</sup>, Yongjie Yang<sup>4</sup>, Gulnaz Begum<sup>2\*</sup>

Please reply to this email "**ASAP**"Thank you,  
Gulnaz Begum

**Re: Author agreement\_CDDIS-21-4158RR**

Chen, Yang &lt;YC21@pitt.edu&gt;

Fri 4/1/2022 9:59 AM

To: Begum, Gulnaz &lt;gub6@pitt.edu&gt;

I agree. Thank you.

Yang

Get [Outlook for Android](#)

---

**From:** Begum, Gulnaz <gub6@pitt.edu>**Sent:** Friday, April 1, 2022 9:52:27 AM**To:** Chen, Yang <YC21@pitt.edu>**Subject:** Author agreement\_CDDIS-21-4158RR

Dear Yang,

Our manuscript entitled "NOX activation in reactive astrocytes regulates astrocytic LCN2 expression and neurodegeneration" has been accepted for publication in Cell death and disease journal. There are following changes in the authorship: "Yang Chen"; "Okan Capuk"; "Ming Sun", and "Jenelle M Collier" have been included because they collected new experimental results in the re submission. Dandan Sun has been removed from the authorship based on her request. Please reply to this email stating you agree to the authorship inclusions/changes. Following is the order of the authors/co-authors as appear in the manuscript.

"NOX activation in reactive astrocytes regulates astrocytic LCN2 expression and neurodegeneration"

Ruijia Liu<sup>1, 2</sup>, Jun Wang<sup>2</sup>, Yang Chen<sup>2</sup>, Jenelle M. Collier<sup>2, 3</sup>, Okan Capuk<sup>2</sup>, Shijie Jin<sup>4</sup>, Ming Sun<sup>5</sup>, Sujan K. Mondal<sup>6</sup>, Theresa L. Whiteside<sup>6</sup>, Donna B. Stolz<sup>5</sup>, Yongjie Yang<sup>4</sup>, Gulnaz Begum<sup>2\*</sup>

Please reply to this email "**ASAP**"

Thank you,  
Gulnaz Begum

**Re: Author agreement\_CDDIS-21-4158RR**

Collier, Jenelle Monet &lt;JMC357@pitt.edu&gt;

Fri 4/1/2022 10:38 AM

To: Begum, Gulnaz &lt;gub6@pitt.edu&gt;

I agree with authorship changed

Jenelle M. Collier  
Pre-Doctoral Fellow, CNUP  
University of Pittsburgh

---

**From:** Begum, Gulnaz <gub6@pitt.edu>  
**Sent:** Friday, April 1, 2022 9:51:18 AM  
**To:** Collier, Jenelle Monet <JMC357@pitt.edu>  
**Subject:** Author agreement\_CDDIS-21-4158RR

Dear Jenelle,

Our manuscript entitled "NOX activation in reactive astrocytes regulates astrocytic LCN2 expression and neurodegeneration" has been accepted for publication in Cell death and disease journal. There are following changes in the authorship: "Yang Chen"; "Okan Capuk"; "Ming Sun", and "Jenelle M Collier" have been included because they collected new experimental results in the re submission. Dandan Sun has been removed from the authorship based on her request. Please reply to this email stating you agree to the authorship inclusions/changes. Following is the order of the authors/co-authors as appear in the manuscript.

"NOX activation in reactive astrocytes regulates astrocytic LCN2 expression and neurodegeneration"

Ruijia Liu<sup>1, 2</sup>, Jun Wang<sup>2</sup>, Yang Chen<sup>2</sup>, Jenelle M. Collier<sup>2, 3</sup>, Okan Capuk<sup>2</sup>, Shijie Jin<sup>4</sup>, Ming Sun<sup>5</sup>, Sujan K. Mondal<sup>6</sup>, Theresa L. Whiteside<sup>6</sup>, Donna B. Stolz<sup>5</sup>, Yongjie Yang<sup>4</sup>, Gulnaz Begum<sup>2\*</sup>

Please reply to this email "**ASAP**"

Thank you,  
Gulnaz Begum

**Re: Author agreement\_CDDIS-21-4158RR**

Capuk, Okan &lt;CAPUK@pitt.edu&gt;

Fri 4/1/2022 11:07 AM

To: Begum, Gulnaz &lt;gub6@pitt.edu&gt;

Hi Gulnaz,

I agree to the authorship inclusions/changes.

Thank you.

Best,

Okan Capuk

[Android için Outlook](#)'u edinin

---

**From:** Begum, Gulnaz <gub6@pitt.edu>**Sent:** Friday, April 1, 2022 9:51:55 AM**To:** Capuk, Okan <CAPUK@pitt.edu>**Subject:** Author agreement\_CDDIS-21-4158RR

Dear Okan,

Our manuscript entitled "NOX activation in reactive astrocytes regulates astrocytic LCN2 expression and neurodegeneration" has been accepted for publication in Cell death and disease journal. There are following changes in the authorship: "Yang Chen"; "Okan Capuk"; "Ming Sun", and "Jenelle M Collier" have been included because they collected new experimental results in the re submission. Dandan Sun has been removed from the authorship based on her request. Please reply to this email stating you agree to the authorship inclusions/changes. Following is the order of the authors/co-authors as appear in the manuscript.

"NOX activation in reactive astrocytes regulates astrocytic LCN2 expression and neurodegeneration"

Ruijia Liu<sup>1, 2</sup>, Jun Wang<sup>2</sup>, Yang Chen<sup>2</sup>, Jenelle M. Collier<sup>2, 3</sup>, Okan Capuk<sup>2</sup>, Shijie Jin<sup>4</sup>, Ming Sun<sup>5</sup>, Sujan K. Mondal<sup>6</sup>, Theresa L. Whiteside<sup>6</sup>, Donna B. Stolz<sup>5</sup>, Yongjie Yang<sup>4</sup>, Gulnaz Begum<sup>2\*</sup>

Please reply to this email "**ASAP**"

Thank you,

Gulnaz Begum

**Re: Author agreement\_CDDIS-21-4158RR**

Shijie Jin <jin.shijie1977@gmail.com>

Fri 4/1/2022 12:17 PM

To: Begum, Gulnaz <gub6@pitt.edu>

Hi Gulnaz:

I agree with this authorship's inclusions/changes in the manuscript entitled "NOX activation in reactive astrocytes regulates astrocytic LCN2 expression and neurodegeneration"

Best regards,  
Shijie

On Fri, Apr 1, 2022 at 9:40 AM Begum, Gulnaz <[gub6@pitt.edu](mailto:gub6@pitt.edu)> wrote:

Dear Shijie,

Our manuscript entitled "NOX activation in reactive astrocytes regulates astrocytic LCN2 expression and neurodegeneration" has been accepted for publication in Cell death and disease journal. There are following changes in the authorship: Yang Chen; Okan Capuk; Ming Sun, and Jenelle M Collier have been included because they collected new experimental results in the re submission. Dandan Sun has been removed from the authorship based on her request. Please reply to this email stating you agree to the authorship inclusions/changes. Following is the order of the authors/co-authors as appear in the manuscript.

"NOX activation in reactive astrocytes regulates astrocytic LCN2 expression and neurodegeneration"

Ruijia Liu<sup>1, 2</sup>, Jun Wang<sup>2</sup>, Yang Chen<sup>2</sup>, Jenelle M. Collier<sup>2, 3</sup>, Okan Capuk<sup>2</sup>, Shijie Jin<sup>4</sup>, Ming Sun<sup>5</sup>, Sujan K. Mondal<sup>6</sup>, Theresa L. Whiteside<sup>6</sup>, Donna B. Stolz<sup>5</sup>, Yongjie Yang<sup>4</sup>, Gulnaz Begum<sup>2\*</sup>

Please reply to this email "ASAP"

Thank you,  
Gulnaz Begum

--

////////////////////////////////////////////////////////////////////////////////////////////////////////////////////////////////

Shijie Jin, Ph.D. (金 世杰 , 김 세걸, キン セイケツ)

Research associate  
Department of Neuroscience Yang Lab  
Tufts University School of Medicine  
136 Harrison Ave.  
Arnold 711  
Boston MA, 02111

e-mail: [jin.shijie1977@gmail.com](mailto:jin.shijie1977@gmail.com)  
[Shijie.Jin@tufts.edu](mailto:Shijie.Jin@tufts.edu)  
[jin\\_shijie@hotmail.com](mailto:jin_shijie@hotmail.com)

Phone: (617) 372-0256

**Re: Author agreement\_CDDIS-21-4158RR**

Sun, Ming <mis23@pitt.edu>

Fri 4/1/2022 9:08 AM

To: Begum, Gulnaz <gub6@pitt.edu>

Congratulations for the acceptance. Yes, I agree to the authorship inclusions/changes.

Thanks

---

From: Begum, Gulnaz <gub6@pitt.edu>  
Sent: Thursday, March 31, 2022 7:37 PM  
To: Sun, Ming  
Subject: Author agreement\_CDDIS-21-4158RR

Dear Ming,

Our manuscript entitled "NOX activation in reactive astrocytes regulates astrocytic LCN2 expression and neurodegeneration" has been accepted for publication in Cell death and disease journal. Please reply to this email stating you agree to the authorship inclusions/changes. Following is the order of the authors/co-authors as appear in the manuscript.

NOX activation in reactive astrocytes regulates astrocytic LCN2 expression and neurodegeneration

Ruijia Liu<sup>1, 2</sup>, Jun Wang<sup>2</sup>, Yang Chen<sup>2</sup>, Jenelle M. Collier<sup>2, 3</sup>, Okan Capuk<sup>2</sup>, Shijie Jin<sup>4</sup>, Ming Sun<sup>5</sup>, Sujan K. Mondal<sup>6</sup>, Theresa L. Whiteside<sup>6</sup>, Donna B. Stolz<sup>5</sup>, Yongjie Yang<sup>4</sup>, Gulnaz Begum<sup>2\*</sup>

Please reply to this email "ASAP"

Thank you,  
Gulnaz Begum

**Re: Author agreement\_CDDIS-21-4158RR**

Mondal, Sujan Kumar &lt;mondals@upmc.edu&gt;

Fri 4/1/2022 10:59 AM

To: Begum, Gulnaz &lt;gub6@pitt.edu&gt;

Dear Gulnaz,

I agree to the authorship inclusions/changes.

Thanks,  
Sujan

---

**From:** Begum, Gulnaz <gub6@pitt.edu>  
**Sent:** Friday, April 1, 2022 9:55 AM  
**To:** Mondal, Sujan Kumar <SUM81@pitt.edu>  
**Subject:** Author agreement\_CDDIS-21-4158RR

Dear Sujan,

Our manuscript entitled "NOX activation in reactive astrocytes regulates astrocytic LCN2 expression and neurodegeneration" has been accepted for publication in Cell death and disease journal. There are following changes in the authorship: "Yang Chen"; "Okan Capuk"; "Ming Sun", and "Jenelle M Collier" have been included because they collected new experimental results in the re submission. Dandan Sun has been removed from the authorship based on her request. Please reply to this email stating you agree to the authorship inclusions/changes. Following is the order of the authors/co-authors as appear in the manuscript.

"NOX activation in reactive astrocytes regulates astrocytic LCN2 expression and neurodegeneration"

Ruijia Liu<sup>1, 2</sup>, Jun Wang<sup>2</sup>, Yang Chen<sup>2</sup>, Jenelle M. Collier<sup>2, 3</sup>, Okan Capuk<sup>2</sup>, Shijie Jin<sup>4</sup>, Ming Sun<sup>5</sup>, Sujan K. Mondal<sup>6</sup>, Theresa L. Whiteside<sup>6</sup>, Donna B. Stolz<sup>5</sup>, Yongjie Yang<sup>4</sup>, Gulnaz Begum<sup>2\*</sup>

Please reply to this email "**ASAP**"Thank you,  
Gulnaz Begum



**RE: Author agreement\_CDDIS-21-4158RR**

Whiteside, Theresa &lt;whitesidetl@upmc.edu&gt;

Fri 4/1/2022 9:53 AM

To: Begum, Gulnaz &lt;gub6@pitt.edu&gt;

Hi! This is to confirm that I agree to the authorship inclusions/changes in the manuscript referred to above, TW

*Theresa L. Whiteside, PhD, MD<sub>HC</sub>  
Professor of Pathology, Immunology and Otolaryngology  
UPMC Hillman Cancer Center  
University of Pittsburgh Cancer Institute  
5117 Centre Avenue  
Pittsburgh, PA 15213  
Phone (412)624-0096*

---

**From:** Begum, Gulnaz <gub6@pitt.edu>  
**Sent:** Thursday, March 31, 2022 8:45 PM  
**To:** Whiteside, Theresa <TWHITE@pitt.edu>  
**Cc:** Whiteside, Theresa <whitesidetl@upmc.edu>  
**Subject:** Author agreement\_CDDIS-21-4158RR

Dear Dr. Theresa,

Our manuscript entitled "NOX activation in reactive astrocytes regulates astrocytic LCN2 expression and neurodegeneration" has been accepted for publication in Cell death and disease journal. Please reply to this email stating you agree to the authorship inclusions/changes. Following is the order of the authors/co-authors as appear in the manuscript.

**NOX activation in reactive astrocytes regulates astrocytic LCN2  
expression and neurodegeneration**

Ruijia Liu<sup>1, 2</sup>, Jun Wang<sup>2</sup>, Yang Chen<sup>2</sup>, Jenelle M. Collier<sup>2, 3</sup>, Okan Capuk<sup>2</sup>, Shijie Jin<sup>4</sup>, Ming Sun<sup>5</sup>, Sujan K. Mondal<sup>6</sup>, Theresa L. Whiteside<sup>6</sup>, Donna B. Stolz<sup>5</sup>, Yongjie Yang<sup>4</sup>, Gulnaz Begum<sup>2\*</sup>

Please reply to this email "**ASAP**"

Thank you,  
Gulnaz Begum

**Re: Author agreement\_CDDIS-21-4158RR**

Stolz, Donna B <donna.stolz@pitt.edu>

Fri 4/1/2022 10:01 AM

To: Begum, Gulnaz <gub6@pitt.edu>

I agree with the authorship changes.  
Donna Stolz

Sent from my iPhone 11  
Please excuse typos!

On Apr 1, 2022, at 9:41 AM, Begum, Gulnaz <gub6@pitt.edu> wrote:

Dear Donna,

Our manuscript entitled "NOX activation in reactive astrocytes regulates astrocytic LCN2 expression and neurodegeneration" has been accepted for publication in Cell death and disease journal. There are following changes in the authorship: Yang Chen; Okan Capuk; Ming Sun, and Jenelle M Collier have been included because they collected new experimental results in the re submission. Dandan Sun has been removed from the authorship based on her request. Please reply to this email stating you agree to the authorship inclusions/changes. Following is the order of the authors/co-authors as appear in the manuscript.

"NOX activation in reactive astrocytes regulates astrocytic LCN2 expression and neurodegeneration"

Ruijia Liu<sup>1, 2</sup>, Jun Wang<sup>2</sup>, Yang Chen<sup>2</sup>, Jenelle M. Collier<sup>2, 3</sup>, Okan Capuk<sup>2</sup>, Shijie Jin<sup>4</sup>, Ming Sun<sup>5</sup>,  
Sujan K. Mondal<sup>6</sup>, Theresa L. Whiteside<sup>6</sup>, Donna B. Stolz<sup>5</sup>, Yongjie Yang<sup>4</sup>, Gulnaz Begum<sup>2\*</sup>

Please reply to this email "ASAP"

Thank you,  
Gulnaz Begum

**Re: Author agreement\_CDDIS-21-4158RR**

Yang, Yongjie &lt;Yongjie.Yang@tufts.edu&gt;

Thu 3/31/2022 8:56 PM

To: Begum, Gulnaz &lt;gub6@pitt.edu&gt;

Yes.

On Mar 31, 2022, at 8:47 PM, Begum, Gulnaz <gub6@pitt.edu> wrote:

Dear Dr. Yongjie,

Our manuscript entitled "NOX activation in reactive astrocytes regulates astrocytic LCN2 expression and neurodegeneration" has been accepted for publication in Cell death and disease journal. Please reply to this email stating you agree to the authorship inclusions/changes. Following is the order of the authors/co-authors as appear in the manuscript.

**NOX activation in reactive astrocytes regulates astrocytic LCN2  
expression and neurodegeneration**

Ruijia Liu<sup>1, 2</sup>, Jun Wang<sup>2</sup>, Yang Chen<sup>2</sup>, Jenelle M. Collier<sup>2, 3</sup>, Okan Capuk<sup>2</sup>,  
Shijie Jin<sup>4</sup>, Ming Sun<sup>5</sup>, Sujan K. Mondal<sup>6</sup>, Theresa L. Whiteside<sup>6</sup>, Donna B.  
Stolz<sup>5</sup>, Yongjie Yang<sup>4</sup>, Gulnaz Begum<sup>2\*</sup>

Please reply to this email **"ASAP"**

Thank you,  
Gulnaz Begum

**RE: Author agreement\_CDDIS-21-4158RR**

Sun, Dandan <sund@upmc.edu>

Fri 4/1/2022 10:18 AM

To: Begum, Gulnaz <gub6@pitt.edu>

Dear Dr. Begum:

Congratulations on your new study! Yes, as we discussed, this is your new, independent research project, I provided some consultant in the study's development, but I decided to remove my name from the authorship.

Thanks.  
Dandan

=====  
Dandan Sun, MD., PhD, FAHA  
Professor, Dept. of Neurology  
Endowed Chair, Brain Disorders Research  
Pittsburgh Institute For Neurodegenerative Diseases  
Univ. of Pittsburgh  
VA Research Career Scientist  
7016 Biomedical Science Tower-3 (BST-3)  
3501 Fifth Ave.  
Pittsburgh, PA 15260, USA  
Phone: 412-624-0418  
Fax: 412-648-3321  
e-mail: [sund@upmc.edu](mailto:sund@upmc.edu)  
[http://www.neurology.upmc.edu/faculty/Sun\\_Dandan.html](http://www.neurology.upmc.edu/faculty/Sun_Dandan.html)  
=====

---

**From:** Begum, Gulnaz <gub6@pitt.edu>  
**Sent:** Thursday, March 31, 2022 8:56 PM  
**To:** Sun, Dandan <sund@upmc.edu>  
**Subject:** Author agreement\_CDDIS-21-4158RR

Dear Dr. Sun,

Our manuscript entitled "NOX activation in reactive astrocytes regulates astrocytic LCN2 expression and neurodegeneration" has been accepted for publication in "Cell death and disease" journal.

As per your request, I have removed your name from the manuscript. Please reply to this email stating you agree to the authorship changes. Following is the order of the authors/co-authors as appear in the manuscript.

**NOX activation in reactive astrocytes regulates astrocytic LCN2  
expression and neurodegeneration**

Ruijia Liu<sup>1, 2</sup>, Jun Wang<sup>2</sup>, Yang Chen<sup>2</sup>, Jenelle M. Collier<sup>2, 3</sup>, Okan Capuk<sup>2</sup>, Shijie Jin<sup>4</sup>, Ming Sun<sup>5</sup>, Sujan K. Mondal<sup>6</sup>, Theresa L. Whiteside<sup>6</sup>, Donna B. Stolz<sup>5</sup>, Yongjie Yang<sup>4</sup>, Gulnaz Begum<sup>2\*</sup>

Please reply to this email **"ASAP"**

Thank you,  
Gulnaz Begum
